# Supplementary material for: Fibrinogen Increases Resveratrol Solubility and Prevents it from Oxidation
Source: PubMed Central journal article supplement (PMC7353596; doi:10.3390/foods9060780), 2020-06-12
Supplement: foods-09-00780-s001.pdf [file foods-09-00780-s001.pdf]

## Supplementary data

### Interactions and effects of the red wine polyphenol resveratrol binding to human fibrinogen

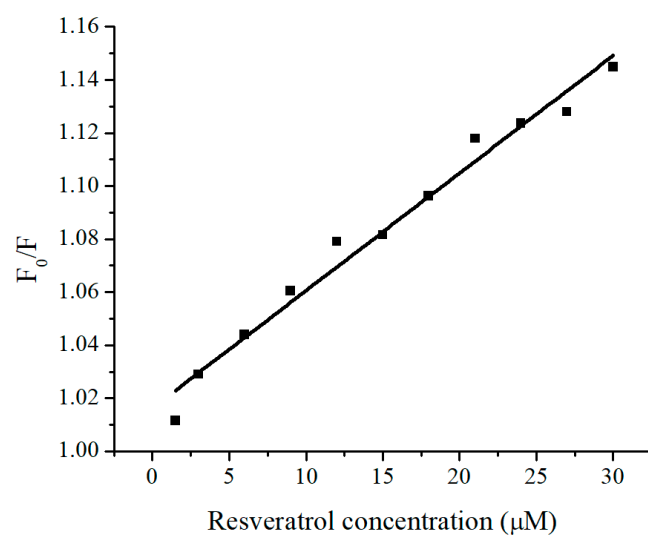

Figure S1. Stern-Volmer (SV) plot used to calculate SV constant and bimolecular quenching rate constant
